# Supplementary material for: Visualization of the surface reconstruction and dynamic catalytic sites of Ni–Fe catalysts for the oxygen evolution reaction by in situ Raman measurements
Source: Royal Society of Chemistry journal article supplement (doi:10.1039/d3ta02306k), 2023-01-01
Supplement: d3ta02306k1.pdf [file d3ta02306k1.pdf]

## Supporting Information

### Visualization of surface reconstruction and dynamic catalytic sites of Ni-Fe catalysts for oxygen evolution reaction by in-situ Raman measurements

Jia-Wei Zhao,<sup>b#</sup> Kaihang Yue,<sup>c#</sup> Zi-Xiao Shi,<sup>b</sup> Shu-Yin Wei,<sup>b</sup> Wei-Qian Liang,<sup>b</sup> Gao-Ren Li<sup>a\*</sup>

<sup>a</sup>College of materials Science and Engineering, Sichuan University, Chengdu 610065, China

<sup>b</sup>School of Chemistry, Sun Yat-sen University, Guangzhou 510275, China

<sup>c</sup>CAS Key Laboratory of Materials for Energy Conversion, Shanghai Institute of Ceramics, Chinese Academy of Sciences (SICCAS), 585 Heshuo Road, Shanghai 200050, China

E-mail: ligaoren@scu.edu.cn

<sup>#</sup>Authors contributed equally to this work.

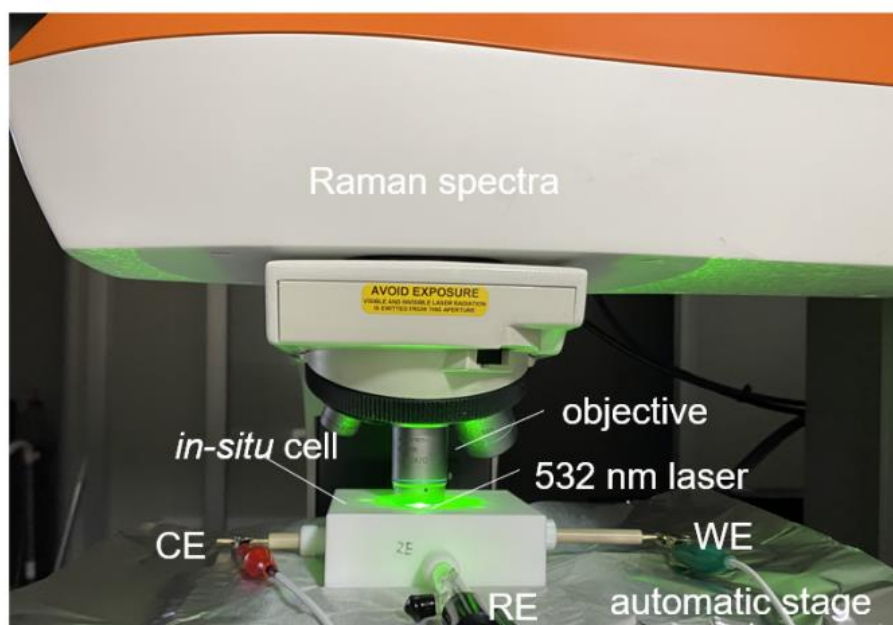

**Figure S1.** Photograph of In-situ Raman spectra device.

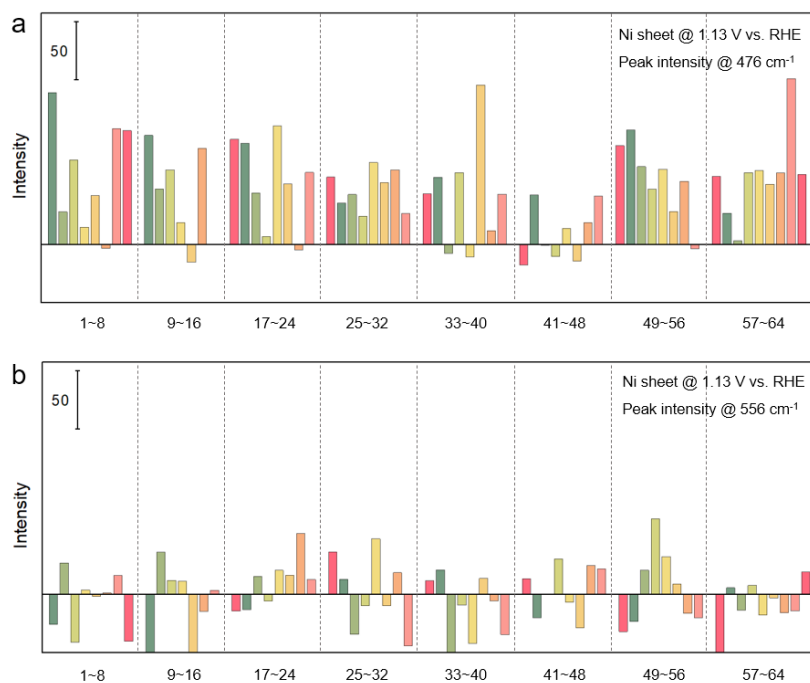

**Figure S2.** Peak intensities ((a) 476 cm<sup>-1</sup>, (b) 556 cm<sup>-1</sup>) of Ni sheet collected by in-situ Raman mapping at 1.13 V vs. RHE.

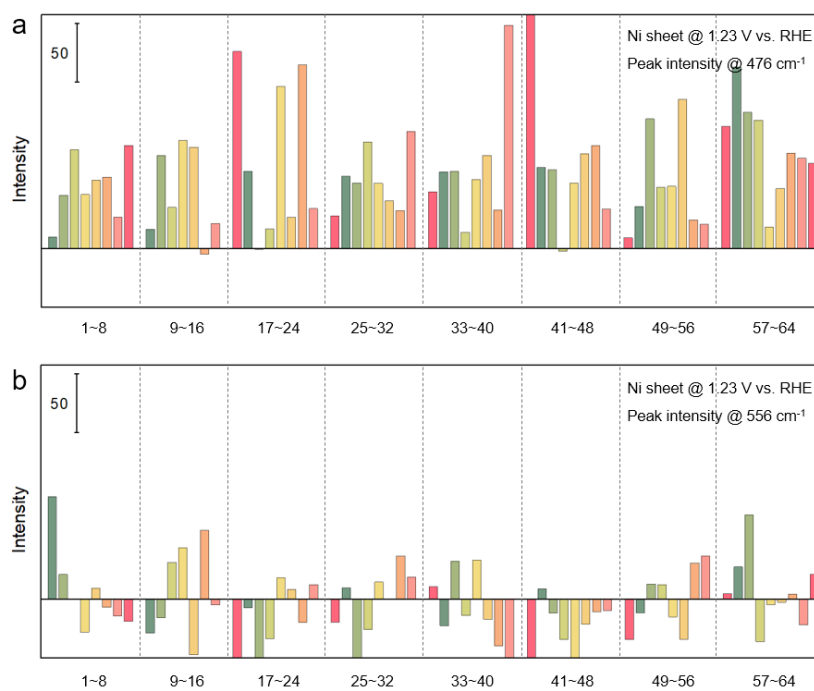

**Figure S3.** Peak intensities ((a)476 cm<sup>-1</sup>, (b)556 cm<sup>-1</sup>) of Ni sheet collected by in-situ Raman mapping at 1.23 V vs. RHE.

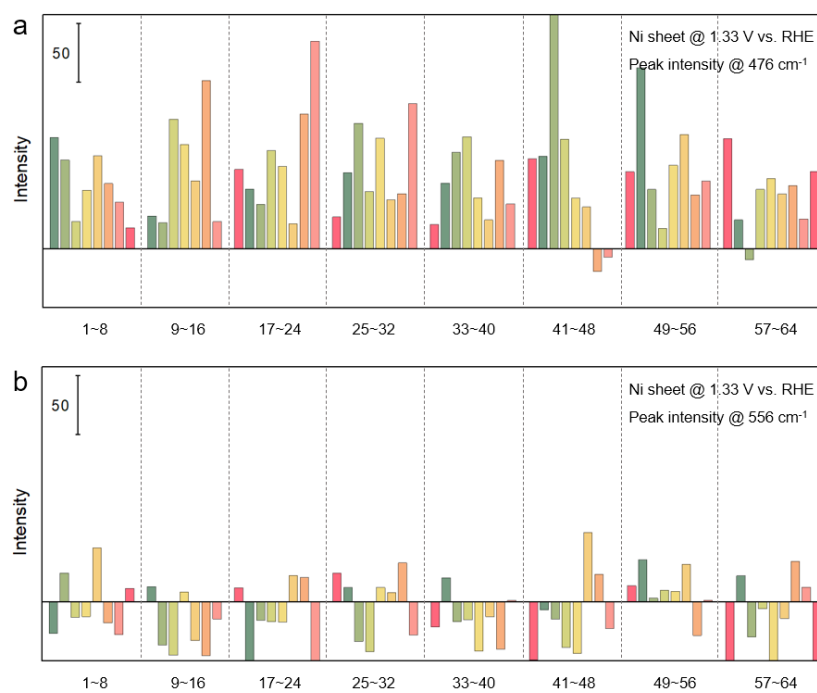

**Figure S4.** Peak intensities ((a)476 cm<sup>-1</sup>, (b)556 cm<sup>-1</sup>) of Ni sheet collected by in-situ Raman mapping at 1.33 V vs. RHE.

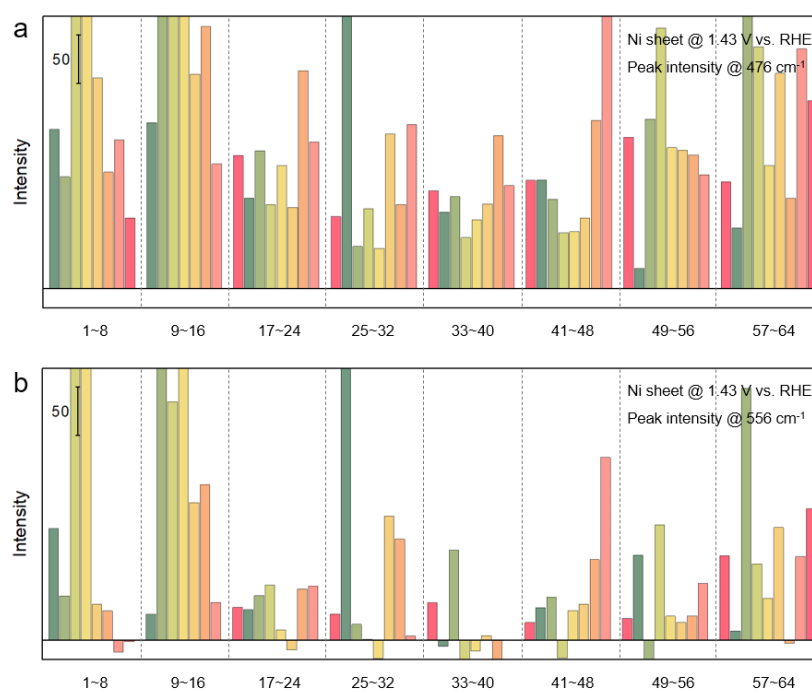

**Figure S5.** Peak intensities ((a)476 cm<sup>-1</sup>, (b)556 cm<sup>-1</sup>) of Ni sheet collected by in-situ Raman mapping at 1.43 V vs. RHE.

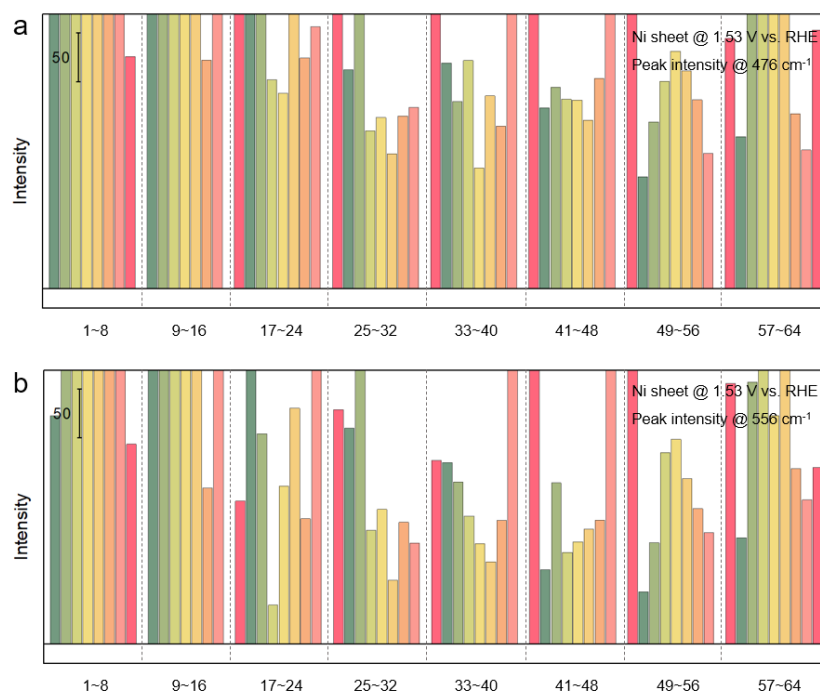

**Figure S6.** Peak intensities ((a)476 cm<sup>-1</sup>, (b)556 cm<sup>-1</sup>) of Ni sheet collected by in-situ Raman mapping at 1.53 V vs. RHE.

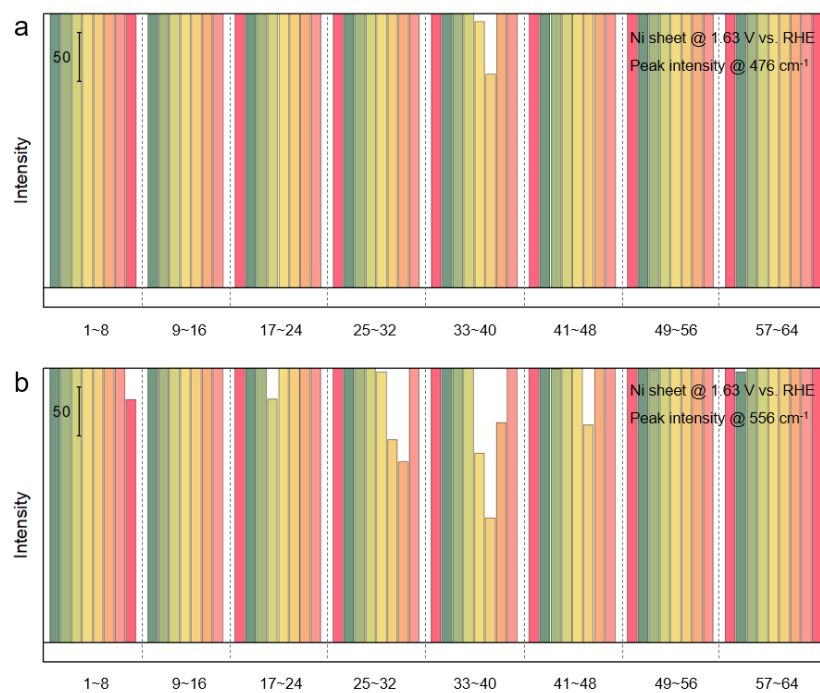

**Figure S7.** Peak intensities ((a)476 cm<sup>-1</sup>, (b)556 cm<sup>-1</sup>) of Ni sheet collected by in-situ Raman mapping at 1.63 V vs. RHE.

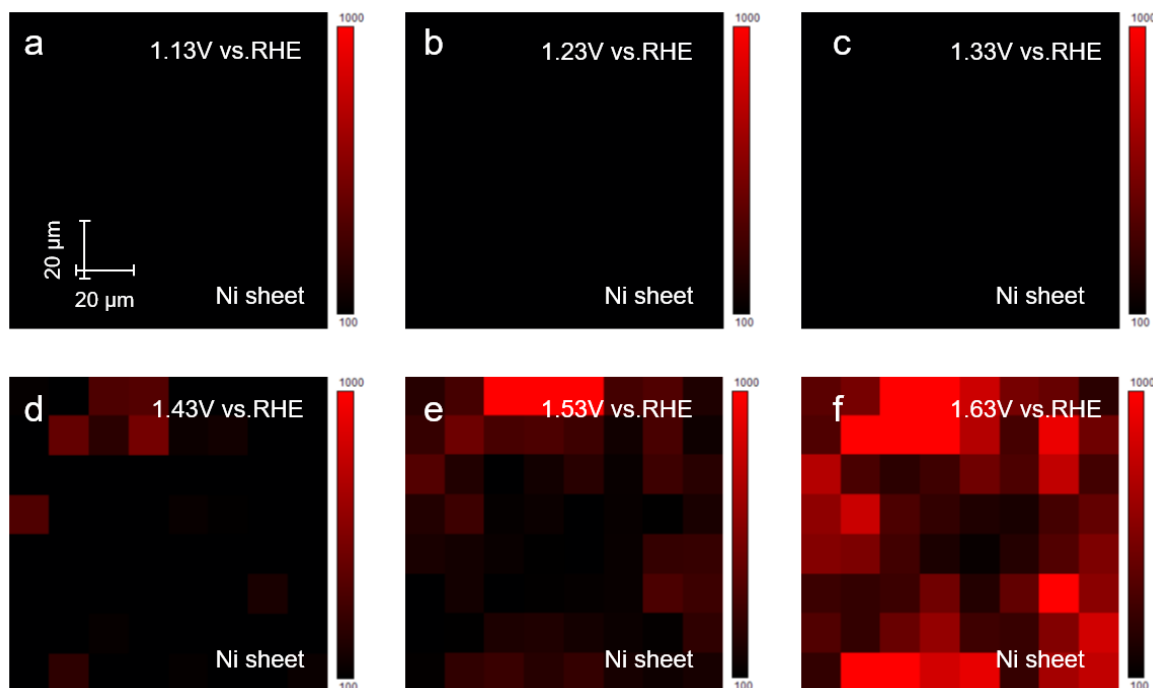

**Figure S8.** In-situ Raman mappings (peak intensity of  $556\text{ cm}^{-1}$ ) of Ni sheet at different potentials.

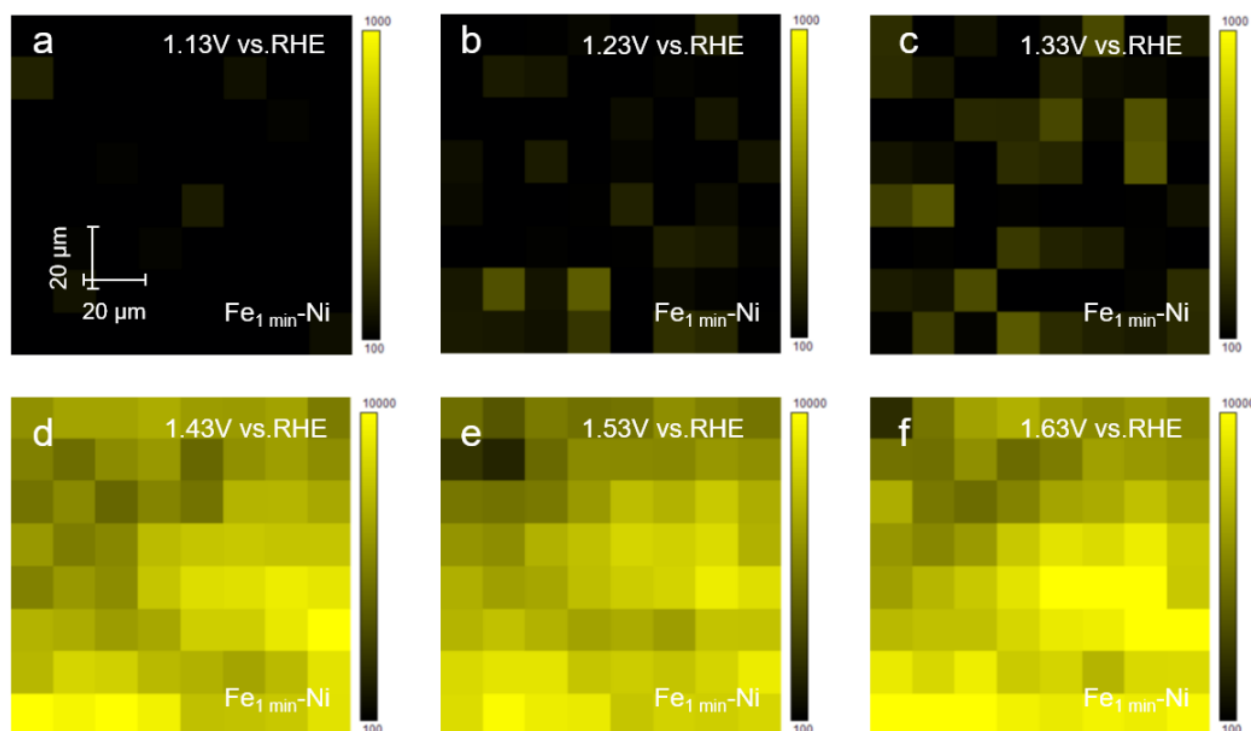

**Figure S9.** In-situ Raman mappings (peak intensity of  $476\text{ cm}^{-1}$ ) of  $\text{Fe}_{1\text{min}}\text{-Ni}$  sheet at different potentials.

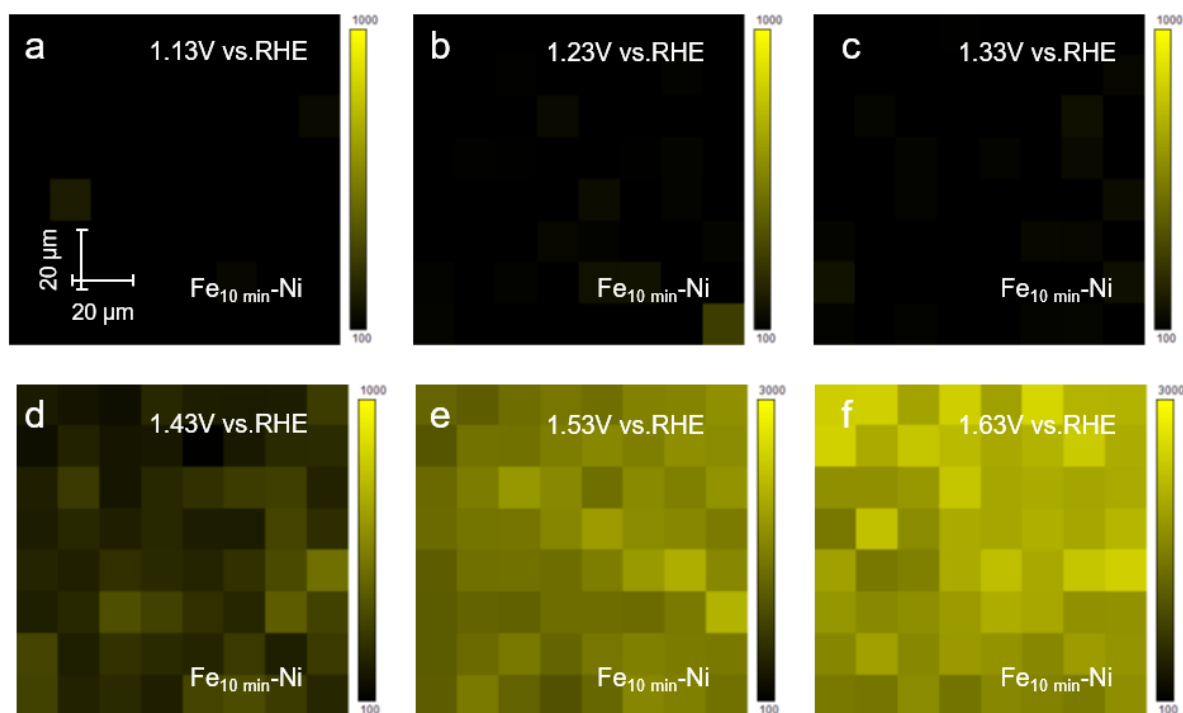

**Figure S10.** In-situ Raman mappings (peak intensity of  $476\text{ cm}^{-1}$ ) of  $\text{Fe}_{10\text{min}}\text{-Ni}$  sheet at different potentials.

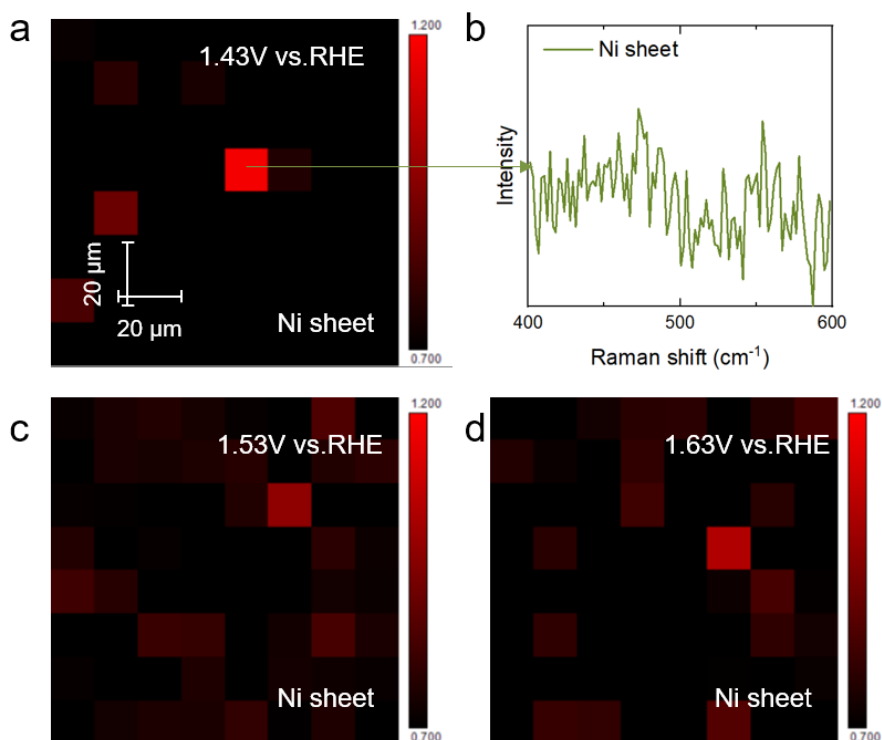

**Figure S11.** (a, c-d) In-situ Raman mappings (peak ratio of  $556\text{ cm}^{-1}$  vs.  $476\text{ cm}^{-1}$ ) of Ni sheet at different potentials. (b) Special signal of Raman spectrum. This is because the intensity of the two peaks is too weak to accurately determine the ratio of intensity.

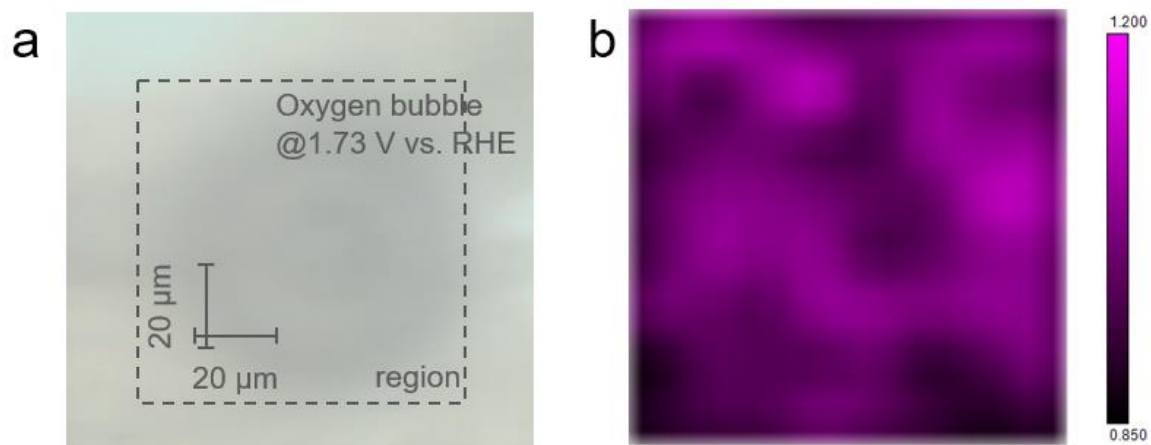

**Figure S12.** Fe<sub>10min</sub>-Ni sheet catalytic sites visualized by in-situ Raman mapping.

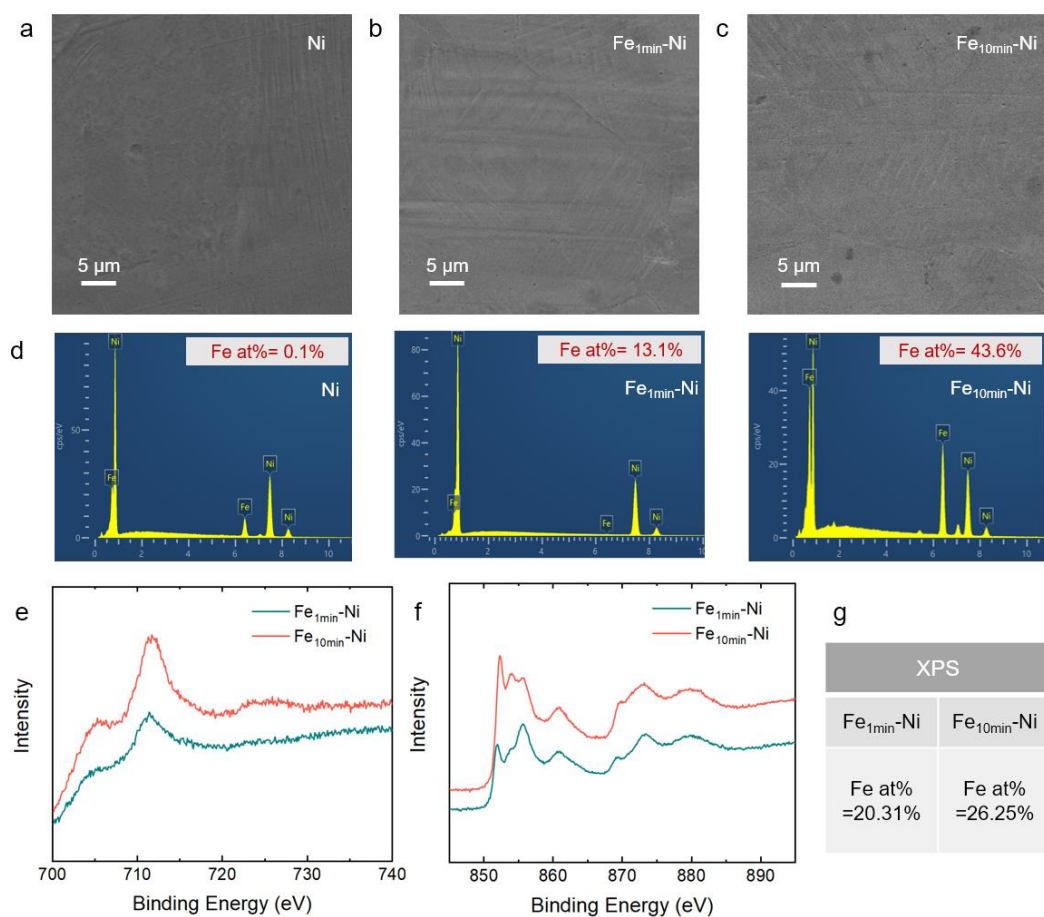

**Figure S13.** (a-c) SEM images of Ni sheets, Fe<sub>1min</sub>-Ni and Fe<sub>10min</sub>-Ni. (d) EDS spectrum of Ni sheets, Fe<sub>1min</sub>-Ni and Fe<sub>10min</sub>-Ni. (e) Fe 2p XPS spectra of Fe<sub>1min</sub>-Ni and Fe<sub>10min</sub>-Ni. (f) Ni 2p XPS spectra of Fe<sub>1min</sub>-Ni and Fe<sub>10min</sub>-Ni. (g) Fe at% of Fe<sub>1min</sub>-Ni and Fe<sub>10min</sub>-Ni.

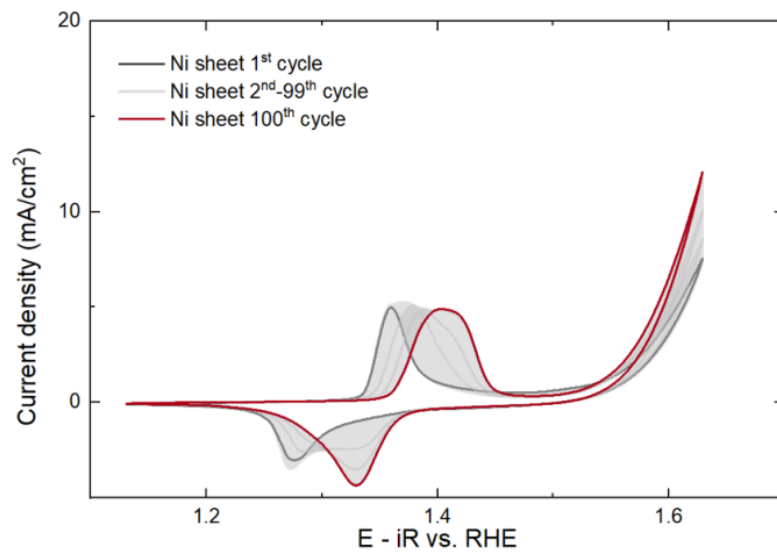

**Figure S14.** CV curves (1-100 cycles) of Ni sheet.

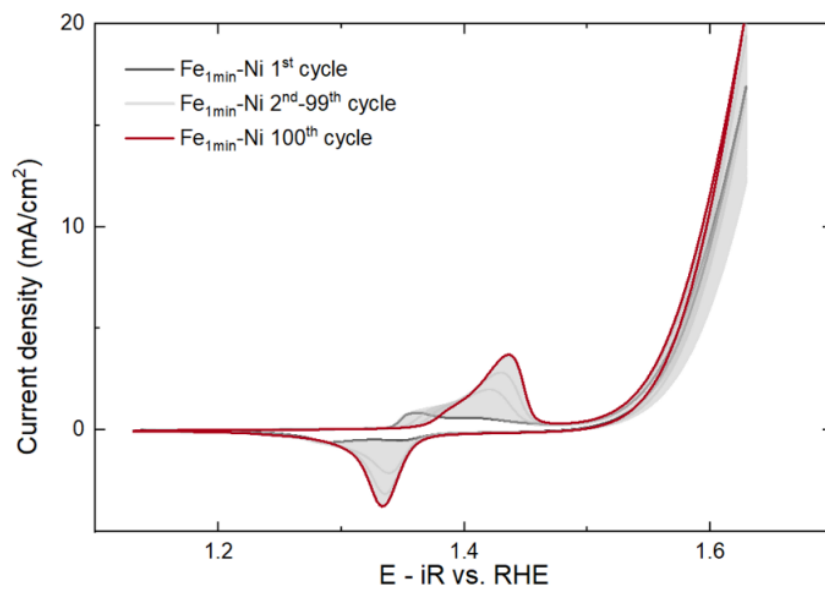

**Figure S15.** CV curves (1-100 cycles) of Fe<sub>1min</sub>-Ni sheet.



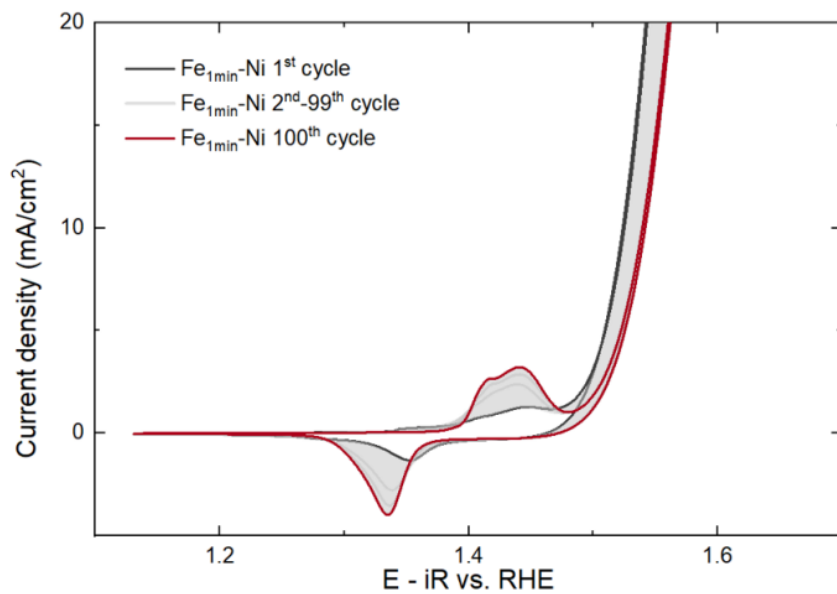

**Figure S16.** CV curves (1-100 cycles) of  $\text{Fe}_{10\text{min}}\text{-Ni}$  sheet.

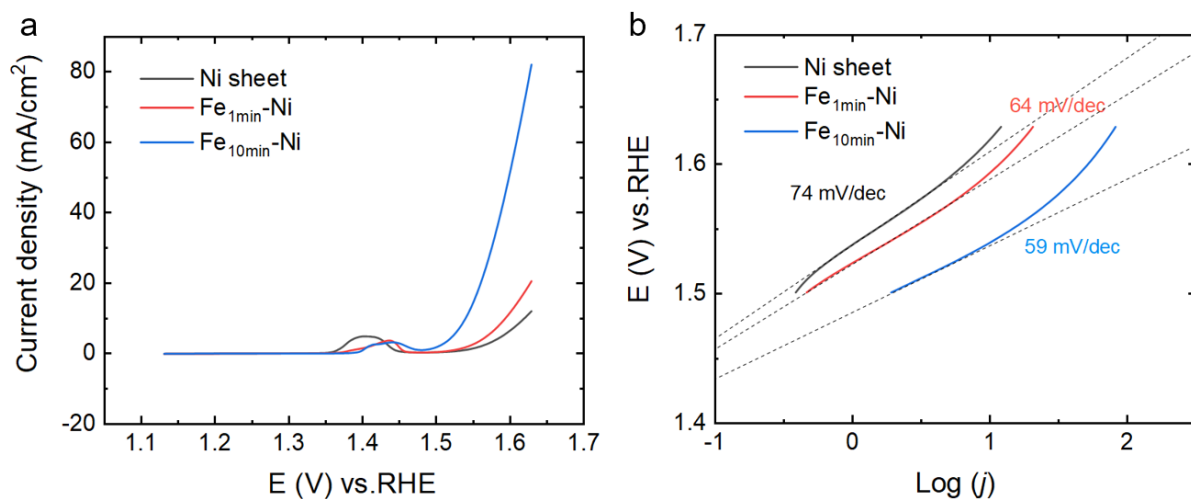

**Figure S17.** (a) OER performance of Ni sheets,  $\text{Fe}_{1\text{min}}\text{-Ni}$  and  $\text{Fe}_{10\text{min}}\text{-Ni}$  samples. (b) Tafel plots of Ni sheets,  $\text{Fe}_{1\text{min}}\text{-Ni}$  and  $\text{Fe}_{10\text{min}}\text{-Ni}$  samples.
